# Supplementary material for: Exploration of the Mechanism of Anlotinib in Reversing PD-1 Immunotherapy Resistance: Insights from Single-cell Sequencing
Source: Research Square preprint supplement (doi:10.21203/rs.3.rs-7277840/v1), 2025-08-28
Supplement: Supplementary file 1 [file 178f2afc7551483b6dfec1fa.pdf]

# Supplemental datas

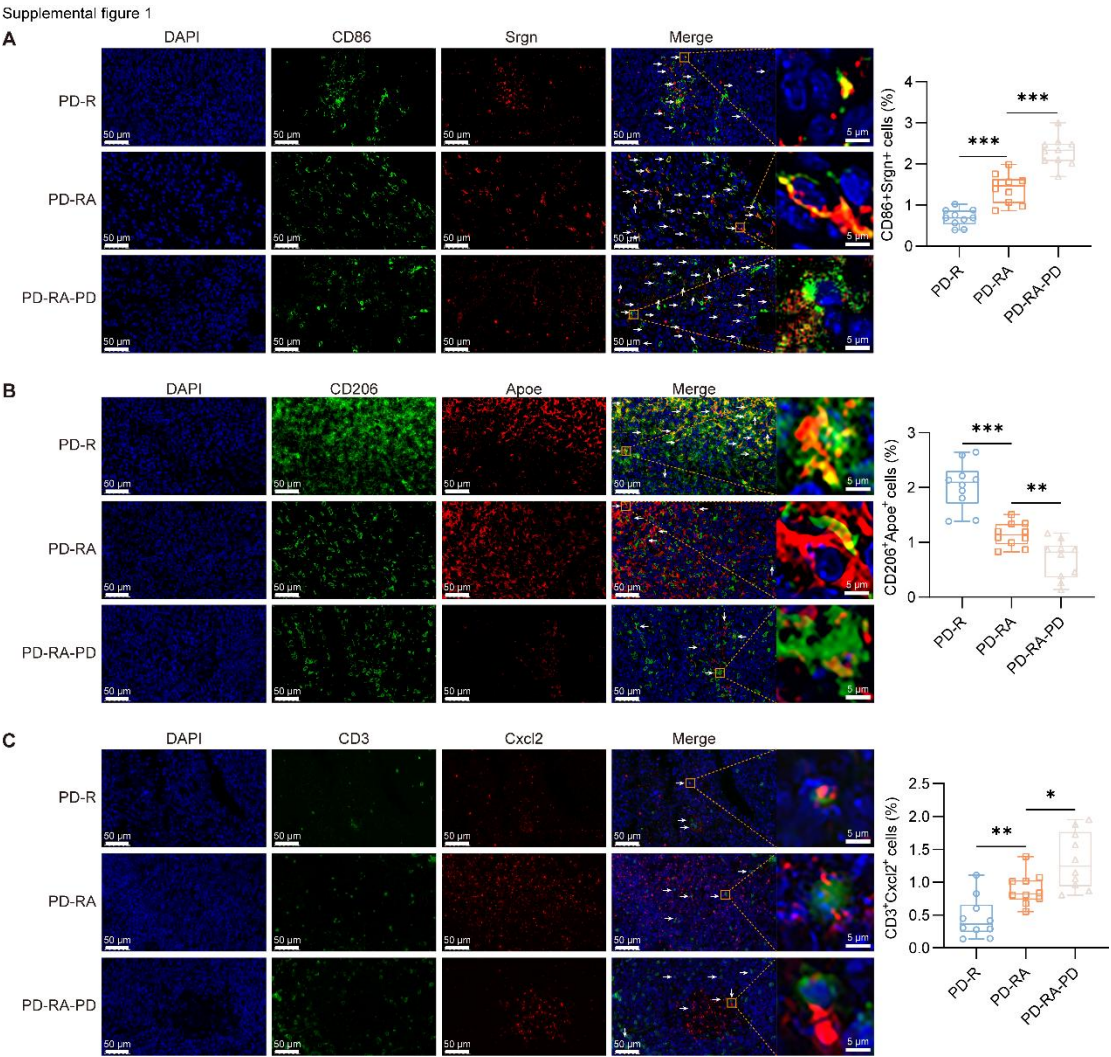

**Figure.S1 Anlotinib reshapes the immune microenvironment by increasing the number of immune cells.**

**(A)** Representative immunofluorescence images show co - staining of CD86 (green, a marker for M1 - like macrophages), Srgn (red), and DAPI (blue, nuclear stain) in tumors from the PD - R, PD - RA, and PD - RA - PD groups. The right - hand plot quantifies the percentage of CD86<sup>+</sup>Srgn<sup>+</sup> double - positive cells. Data are presented as mean  $\pm$  SD. (n = 10 independent experiments). P values were calculated using multiple

t-tests.

**(B)** Representative images depict co - staining of CD206 (green, a marker for M2-like macrophages), Apoe (red), and DAPI in tumor tissues. The right - hand plot quantifies the proportion of CD206<sup>+</sup>Apoe<sup>+</sup> double - positive cells. Data are presented as mean  $\pm$  SD. (n = 10 independent experiments). P values were calculated using multiple t-tests.

**(C)** Representative images illustrate co - staining of CD3 (green, a marker for T cells), Cxcl2 (red), and DAPI. The right - hand plot quantifies the percentage of CD3<sup>+</sup>Cxcl2<sup>+</sup> double - positive cells. Data are presented as mean  $\pm$  SD. (n = 10 independent experiments). P values were calculated using multiple t-tests.

910 **Supplementary Table 1. Antibodies used in this study.**

| Antigens | Manufacturer | Cat No.    |
|----------|--------------|------------|
| CD3      | Proteintech  | 81324-1-RR |
| CD86     | Proteintech  | 30691-1-AP |
| CD206    | Proteintech  | 18704-1-AP |
| Apoe     | Proteintech  | 66830-1-Ig |
| Srgn     | Chemcruz     | sc-374657  |
| Cxcl2    | Huabio       | HA723640   |
| Ki67     | Proteintech  | 66555-6-Ig |

911

912 **Supplementary Table 2. Annotation gene markers used in this study.**

| Marker                                 | Celltype        |
|----------------------------------------|-----------------|
| Myc, Igfbp4, Ccn1, Rhox5, Nedd4        | Tumor cell      |
| Ccl8, C1qb, C1qc, Selenop, Apoe        | Macrophages     |
| Chil3, H2-Ab1, Thbs1, Il1b, Plac8      | Monocyte        |
| Gzma, Gzmb, Ir2b, Gzmc, Trbc2          | T cell          |
| S100a9, S100a8, Retnlg, Ifitm1, Hdc    | Neutrophils     |
| Col1a1, Col1a2, Serping1, Trfaip6, Dcn | Fibroblasts     |
| Igfbp3, Ctla2a, Aqp1, Igfbp7, Sparc    | Endothelial     |
| Ccr7, Cacnb3, Serpinb6b, Ccl5, Tmem123 | Dendritic cells |

913

**Supplementary Table 3. Feature gene markers used in this study**

| Marker                                                                            | Feature                   |
|-----------------------------------------------------------------------------------|---------------------------|
| Mki67, Pcnt, Pcn                                                                  | Proliferation Marker      |
| Cdh2, Vim, Zfp36, Pecam1                                                          | Metastasis Marker         |
| Nos2, Il1b, Tnf, Il6, Cxcl9, Cxcl10, Icam1                                        | M1 Macrophage             |
| Arg1, Mrc1, Il10, Cd206, Retnla, Fizz1, Tgfr1                                     | M2 Macrophage             |
| Gzma, Klra4, Klra8, Gzmg, Gzme, Gzmd                                              | T CTL                     |
| Cd4, Icos, Tnfsf11                                                                | Treg                      |
| Cd8a, Cd8b1, Pdcd1                                                                | CD8+ T exhaustion         |
| Ccl2, Cxcl2, Ccl7"                                                                | T CXCL                    |
| Stmn1, Pclaf, Rrm2                                                                | CD8 Proliferating         |
| Cxcr4, Ifit3, Ifit1"                                                              | CD8 Memory                |
| Cxcl1, Cxcl2, Cxcr2, Ccl2, Ccl5                                                   | MDSC recruitment          |
| Ccl22, Ccr4, Tgfb1, Cxcr3                                                         | Treg recruitment          |
| Cxcl1, Cxcl2, Cxcr2, Il-17                                                        | N2 Neutrophil recruitment |
| Ccl5, Mcp1, Vegf                                                                  | M2 Macrophage recruitment |
| Tnf, Ifng, Nos2, Il12b, Il1b, Cxcl9, Cxcl10, Ccl5                                 | Anti-tumor Monocyte       |
| Arg1, Mrc1, Vegfa, Il10, Tgfb1, Cd163, Ccl22, Cxcr2, S100a8, S100a9, Il4ra        | Pro-tumor Monocyte        |
| Itgam, Ly6c, Ly6g, Arg1, Nos2, S100a8, S100a9, Ccl2, Cxcr2, Pdcd1lg2, Il10, Tgfb1 | MDSC                      |
| Tnf, Il1b, Cxcl9, Cxcl10, Ccl5, Ifng, Nos2, Mpo                                   | Neutrophil anti-tumor     |
| Cd3e, Cd8a, Ifng, Il2, Tnf, Gzma, Gzmb, Perforin, Ccl5, Cxcl9                     | T cell anti-tumor         |
| Ifng, Il12b, Ccl5, Cxcl9, Cxcl10, Tnf, Il1b, Nos2                                 | ImmunoEnhancement         |
| Tnf, Ccl3, Icam1, Mpo, Il1b, Il6, Il12                                            | N1 Neutrophil Marker      |
| Ccl2, Ccl3, Ccl4, Ccl8, Ccl12, Ccl17, Cxcl1, Cxcl2,                               | N2 Neutrophil Marker      |

---

Cxcl8, Cxcl16, Mmp2, Mmp9, Vegfa, Hgf

---

915
